# Supplementary material for: Directly converting CO2 into a gasoline fuel
Source: PubMed Central journal article supplement (PMC5418575; doi:10.1038/ncomms15174), 2017-05-02
Supplement: ncomms15174-s1.pdf [file ncomms15174-s1.pdf]

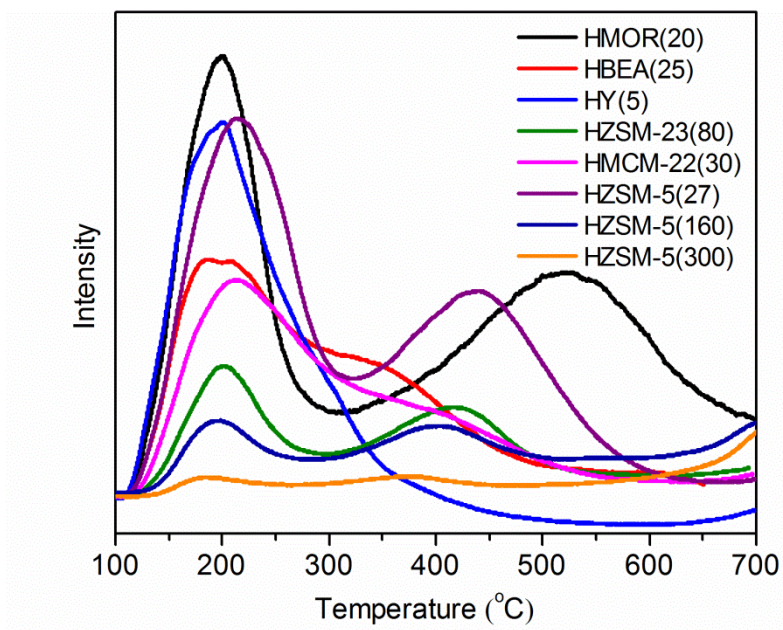

**Supplementary Figure 1 | NH<sub>3</sub>-TPD profiles of different zeolites.**

The acidity of the zeolites was investigated by ammonia temperature-programmed desorption (NH<sub>3</sub>-TPD) studies. The NH<sub>3</sub>-TPD spectra mainly show one peak at 110–300 °C and one peak above 310 °C, which correspond to the weak acid sites and strong acid sites of the zeolites, respectively.

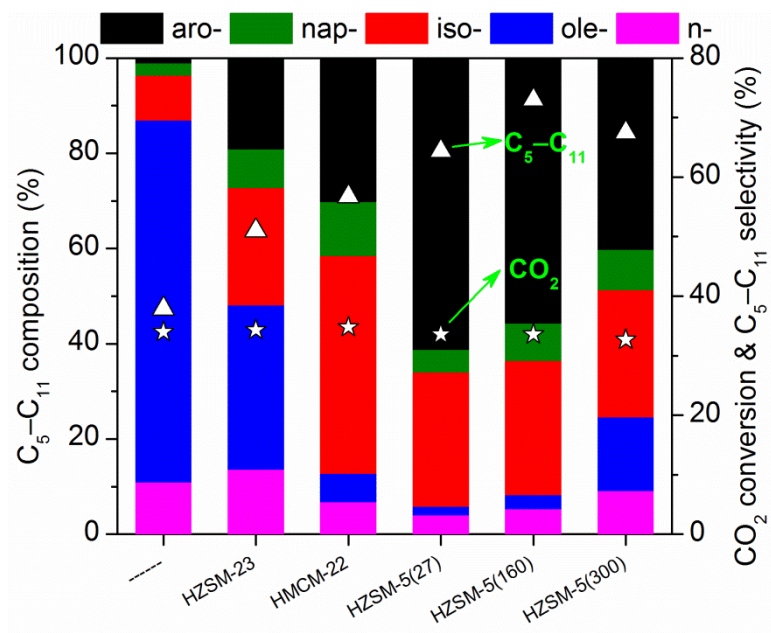

**Supplementary Figure 2 | The  $C_5-C_{11}$  composition over different Na- $Fe_3O_4$ /Zeolite multifunctional catalysts.** Note: n-: n-paraffin; ole-: olefin; iso-: isoparaffin; nap-: naphthene; aro-: aromatic.

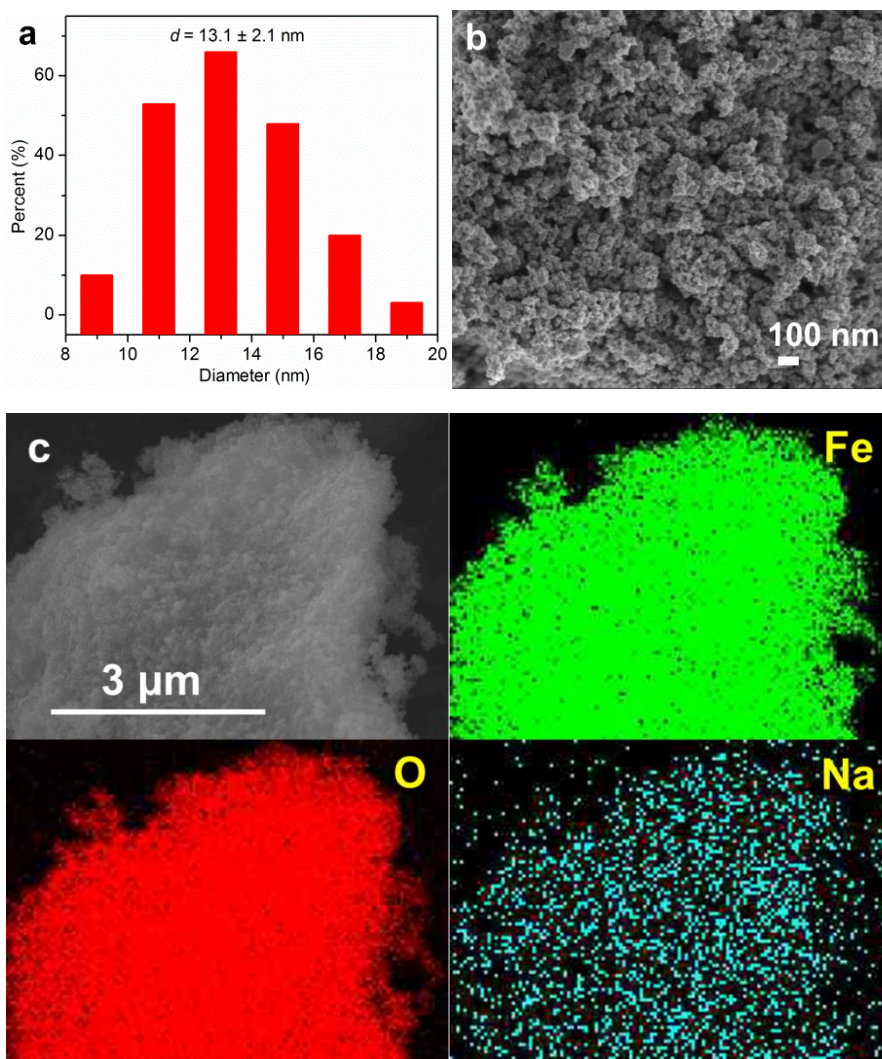

**Supplementary Figure 3 | Characterization of Na-Fe<sub>3</sub>O<sub>4</sub> catalyst.** **a**, Particle size distribution of Na-Fe<sub>3</sub>O<sub>4</sub> catalyst (calculated on the basis of 200 nanospheres from TEM images). **b**, SEM images of Na-Fe<sub>3</sub>O<sub>4</sub> catalyst. **c**, SEM micrograph and corresponding EDS elemental mapping of Na-Fe<sub>3</sub>O<sub>4</sub> catalyst. Iron, oxygen and sodium elements are colored in green, red and cyan, respectively.

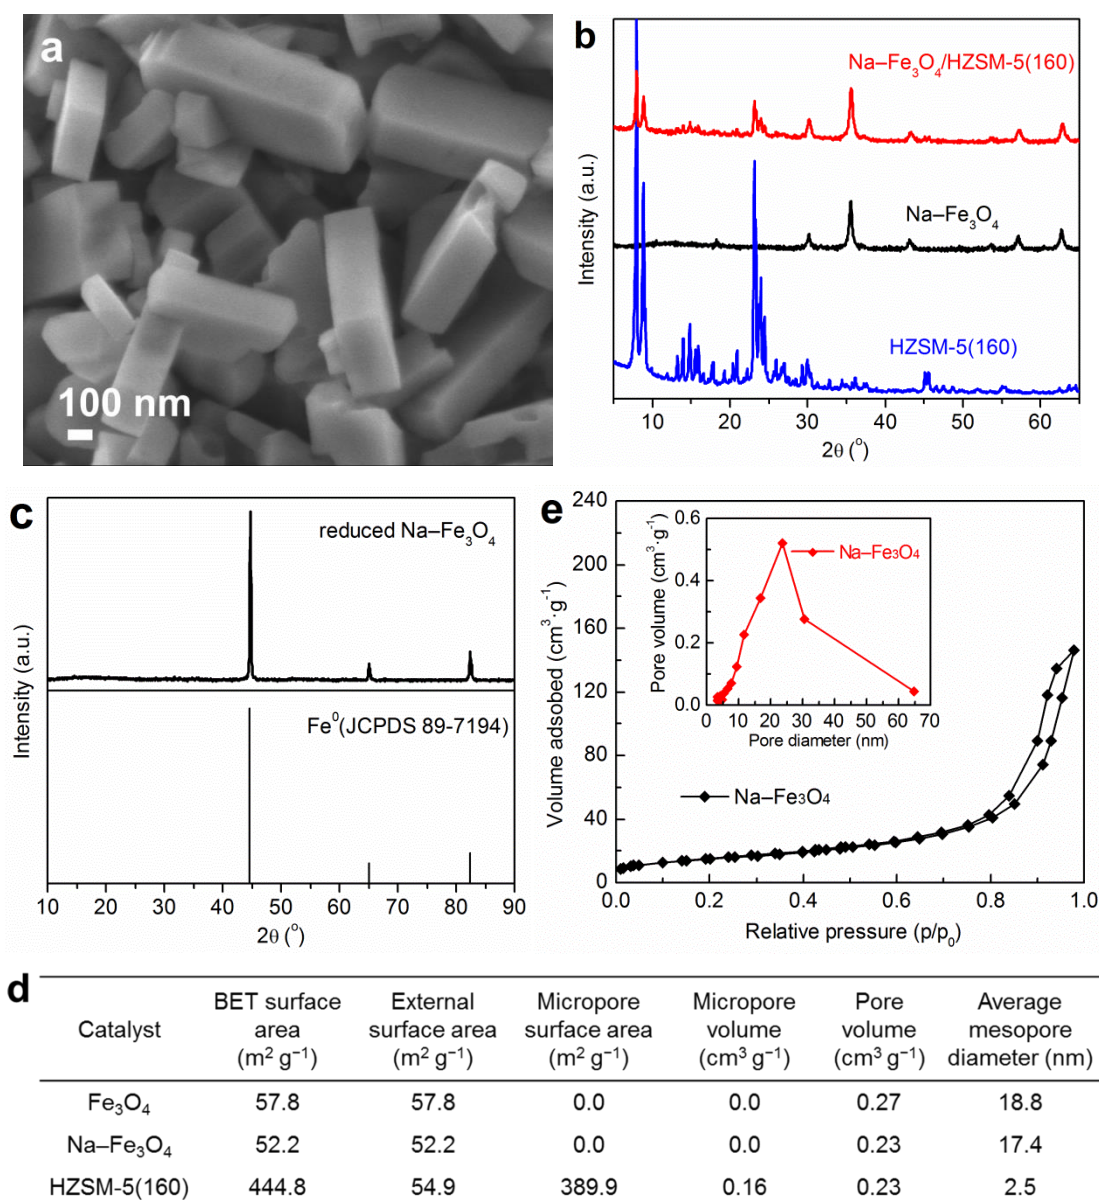

**Supplementary Figure 4 | SEM, XRD and BET analyses of the catalysts.** **a**, SEM images of HZSM-5(160). **b**, XRD patterns of Na-Fe<sub>3</sub>O<sub>4</sub>, HZSM-5(160) and the resulting Na-Fe<sub>3</sub>O<sub>4</sub>/HZSM-5 composite catalyst. The XRD of HZSM-5 shows peaks corresponding to hydrogen aluminum silicate hydrate, as expected. **c**, XRD pattern of reduced Na-Fe<sub>3</sub>O<sub>4</sub>. **d**, BET analyses of Fe<sub>3</sub>O<sub>4</sub>, Na-Fe<sub>3</sub>O<sub>4</sub> and HZSM-5(160) catalysts. **e**, N<sub>2</sub> adsorption-desorption isotherm and pore distribution of the Na-Fe<sub>3</sub>O<sub>4</sub> catalyst. The catalyst exhibits a very broad pore distribution in the range of 7–40 nm with a maximum at ~22 nm, mainly formed by the agglomerates of Fe<sub>3</sub>O<sub>4</sub> nanoparticles.

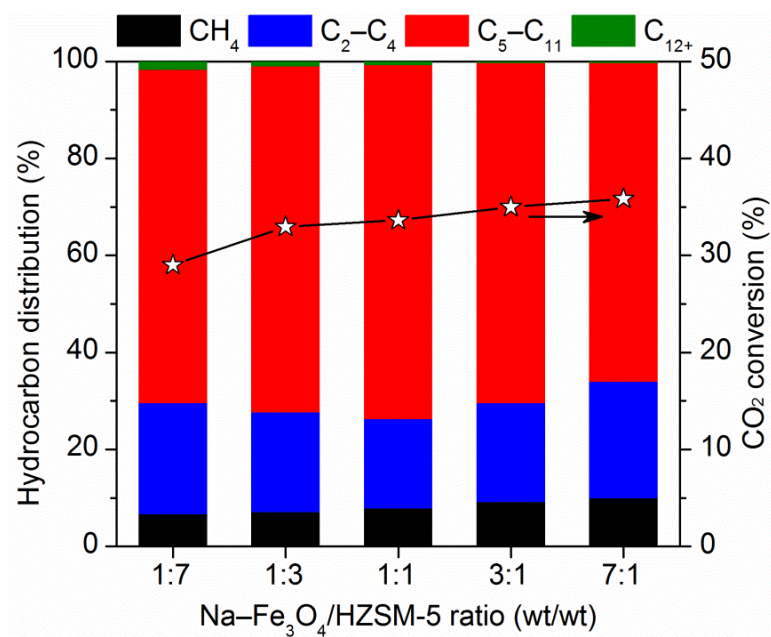

**Supplementary Figure 5 | Catalytic performances over composite catalysts as a function of the mass ratio of Na-Fe<sub>3</sub>O<sub>4</sub>/HZSM-5 in the composite catalysts.**

Reaction conditions: H<sub>2</sub>/CO<sub>2</sub> = 3.0, 320 °C, 3.0 MPa, 4,000 ml h<sup>-1</sup> g<sub>cat</sub><sup>-1</sup>.

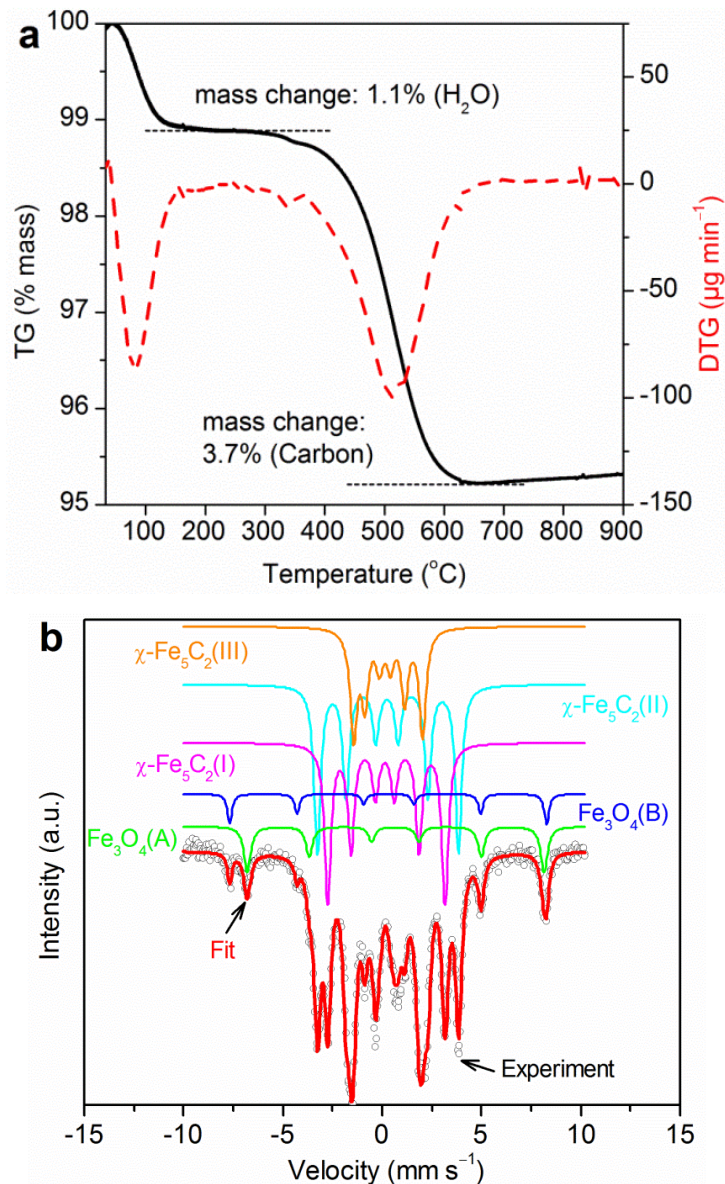

**Supplementary Figure 6 | TG and Mössbauer spectra analyses of the catalysts. a,** TG & DTG of HZSM-5 in the composite catalyst after reaction tests of 1,000 h in Fig. 4c. **b,** Mössbauer spectra of Na-Fe<sub>3</sub>O<sub>4</sub> in the composite catalyst after reaction tests of 1,000 h in Fig. 4c. The detailed Mössbauer parameters are listed in Supplementary Table 5. <sup>57</sup>Fe Mössbauer spectroscopy is a powerful tool to identify and quantify the iron phases formed during CO<sub>2</sub> hydrogenation reaction. As shown in Supplementary Table 5, the sextets with Hhf of 495 and 463 kOe can be attributed to tetrahedral site (A site) and octahedral site (B site) of magnetite (Fe<sub>3</sub>O<sub>4</sub>), respectively<sup>1</sup>. The three

sextets with Hhf values of 183 (Sextet I), 220 (Sextet II) and 108 kOe (Sextet III), respectively, agree well with the literature values for three sites in Hägg iron carbide ( $\chi$ -Fe<sub>5</sub>C<sub>2</sub>)<sup>2</sup>.

**Supplementary Table 1 | Description of the channel systems of zeolites <sup>a</sup>.**

| Zeolite type | Framework type | Ring size (T-atoms) | Channel system                                                | Channel system |
|--------------|----------------|---------------------|---------------------------------------------------------------|----------------|
| HMOR         | MOR            | 12,8,5,4            | [001] <b>12</b> 6.5 × 7.0* ↔<br>[001] <b>8</b> 2.6 × 5.7**    | 1-dimensional  |
| HBEA         | BEA            | 12,6,5,4            | <100> <b>12</b> 6.6 × 6.7** ↔<br>[001] <b>12</b> 5.6 × 5.6*   | 3-dimensional  |
| HY           | FAU            | 12,6,4              | <111> <b>12</b> 7.4 × 7.4***                                  | 3-dimensional  |
| HZSM-23      | MTT            | 10,6,5              | [001] <b>10</b> 4.5 × 5.2*                                    | 1-dimensional  |
| HMCM-22      | MWW            | 10,6,5,4            | [001] <b>10</b> 4.0 × 5.5**  <br>[001] <b>10</b> 4.1 × 5.1**  | 2-dimensional  |
| HZSM-5       | MFI            | 10,6,5,4            | {[100] <b>10</b> 5.1 × 5.5 ↔<br>[010] <b>10</b> 5.3 × 5.6}*** | 3-dimensional  |

<sup>a</sup> Data are from the International Zeolite Association (IZA).



**Supplementary Table 2 | CO<sub>2</sub> hydrogenation performance data in our work and from other literatures.**

| Catalyst                                                 | T (°C) | P (bar) | CO <sub>2</sub> conv. (%) | CO sel. (%) | Hydrocarbon distribution (%) |                                |                   |
|----------------------------------------------------------|--------|---------|---------------------------|-------------|------------------------------|--------------------------------|-------------------|
|                                                          |        |         |                           |             | CH <sub>4</sub>              | C <sub>2</sub> –C <sub>4</sub> | C <sub>5+</sub>   |
| Fe-Zn-Zr/HZSM-5 <sup>3</sup>                             | 360    | 50      | 19.5                      | 57.4        | 2                            | 46                             | 52                |
| Fe-Zn-Zr@HZSM-5–HY <sup>4</sup>                          | 340    | 50      | 14.2                      | 40.5        | 1.8                          | 64.2                           | 34.0              |
| Fe-Ce/KY <sup>5</sup>                                    | 300    | 10      | 20.1                      | 34.6        | 8.9                          | 41.5                           | 49.6              |
| Fe/RbY <sup>6</sup>                                      | 300    | 10      | 17.2                      | 31.6        | 9.5                          | 36.1                           | 54.4              |
| Fe-Cu-Na/HZSM-5 <sup>7</sup>                             | 250    | 20      | 12.3                      | 19.6        | 28.5                         | 42.3                           | 29.2              |
| CuFeO <sub>2</sub> <sup>8</sup>                          | 300    | 10      | 17.3                      | 31.7        | 2.7                          | 31.0                           | 66.3 <sup>a</sup> |
| Cu-Zn-Al/HB <sup>9</sup>                                 | 300    | 9.8     | 27.6                      | 53.4        | 1.5                          | 93.5                           | 5.0               |
| Fe-Zn-Zr/HY <sup>10</sup>                                | 340    | 50      | 22.4                      | 50.4        | 1.8                          | 83.9                           | 14.3              |
| Cu-Zn-Zr-Al/Pdβ <sup>11</sup>                            | 260    | 20      | 25.2                      | 47.2        | 1.2                          | 77.6                           | 21.2              |
| <b>Na-Fe<sub>3</sub>O<sub>4</sub>/HZSM-5<sup>b</sup></b> | 320    | 30      | 22.0                      | 20.1        | 4.0                          | 16.6                           | <b>79.4</b>       |

<sup>a</sup> The C<sub>5+</sub> products cover the gasoline (C<sub>5</sub>–C<sub>11</sub>), diesel (C<sub>12</sub>–C<sub>21</sub>) ranges, and ~15% of waxy hydrocarbons (C<sub>25+</sub>).

<sup>b</sup> The data in our work. The C<sub>5+</sub> products cover 78.3% of C<sub>5</sub>–C<sub>11</sub>, and 1.1% of C<sub>12+</sub> hydrocarbons.

**Supplementary Table 3 | Reaction performance for CO<sub>2</sub> hydrogenation <sup>a</sup>.**

| Catalyst                                       | CO <sub>2</sub><br>conv.<br>(%) | Product selectivity<br>(%) |      |      | Hydrocarbon distribution<br>(C-mol %) |                  |                   |                  |
|------------------------------------------------|---------------------------------|----------------------------|------|------|---------------------------------------|------------------|-------------------|------------------|
|                                                |                                 | CO                         | Oxy- | HC   | CH <sub>4</sub>                       | C <sub>2-4</sub> | C <sub>5-11</sub> | C <sub>12+</sub> |
| Fe <sub>3</sub> O <sub>4</sub>                 | 21.4                            | 10.6                       | 1.6  | 87.8 | 53.3                                  | 41.8             | 4.9               | 0.0              |
| Na-Fe <sub>3</sub> O <sub>4</sub>              | 34.0                            | 14.3                       | 4.0  | 81.7 | 11.7                                  | 48.4             | 37.9              | 2.0              |
| Na-Fe <sub>3</sub> O <sub>4</sub> /HZSM-5(160) | 33.6                            | 14.2                       | 0.0  | 85.8 | 7.9                                   | 18.4             | 73.0              | 0.7              |
| 2%Na-10%Fe/HZSM-5                              | 5.4                             | 29.5                       | 0.0  | 70.5 | 49.3                                  | 43.9             | 6.8               | 0.0              |

<sup>a</sup> Reaction conditions: H<sub>2</sub>/CO<sub>2</sub> = 3.0, 320 °C, 3.0 MPa, 4,000 ml h<sup>-1</sup>.

**Supplementary Table 4 | Detailed composition of the aromatics fraction over Na-Fe<sub>3</sub>O<sub>4</sub>/HZSM-5(160) catalysts in Fig. 1a,d.**

|                  | Aromatics                   | Content in all aromatics (C-mol %) |
|------------------|-----------------------------|------------------------------------|
| C <sub>6</sub>   | benzene                     | 0.9                                |
| C <sub>7</sub>   | toluene                     | 8.5                                |
| C <sub>8</sub>   | ethylbenzene                | 3.1                                |
|                  | xylene (m-, p-, o-)         | 25.3                               |
| C <sub>9</sub>   | propylbenzene               | 0.8                                |
|                  | ethyltoluene (m-, p-, o-)   | 22.8                               |
|                  | trimethylbenzene            | 13.4                               |
| C <sub>10</sub>  | diethylbenzene              | 2.9                                |
|                  | methyl propylbenzene        | 2.4                                |
|                  | dimethyl ethylbenzene       | 11.9                               |
|                  | durene (tetramethylbenzene) | 1.2                                |
| C <sub>11</sub>  | ----                        | 5.3                                |
| C <sub>12+</sub> | ----                        | 1.5                                |
| SUM              |                             | 100.0                              |

**Supplementary Table 5 | Detailed Mössbauer parameters.**

| Figure                   | Assignment                             | Mössbauer parameters |              |              |                              |
|--------------------------|----------------------------------------|----------------------|--------------|--------------|------------------------------|
|                          |                                        | IS<br>(mm/s)         | QS<br>(mm/s) | Hhf<br>(kOe) | Spectral<br>contribution (%) |
| Fig. 2f                  | Fe <sub>3</sub> O <sub>4</sub> (A)     | 0.30                 | -0.02        | 496          | 13.2                         |
|                          | Fe <sub>3</sub> O <sub>4</sub> (B)     | 0.67                 | 0.00         | 463          | 19.2                         |
|                          | χ-Fe <sub>5</sub> C <sub>2</sub> (I)   | 0.18                 | 0.05         | 185          | 25.0                         |
|                          | χ-Fe <sub>5</sub> C <sub>2</sub> (II)  | 0.25                 | 0.09         | 218          | 25.9                         |
|                          | χ-Fe <sub>5</sub> C <sub>2</sub> (III) | 0.20                 | 0.13         | 109          | 16.7                         |
| Supplementary<br>Fig. 6b | Fe <sub>3</sub> O <sub>4</sub> (A)     | 0.31                 | -0.03        | 495          | 4.1                          |
|                          | Fe <sub>3</sub> O <sub>4</sub> (B)     | 0.67                 | 0.02         | 463          | 9.0                          |
|                          | χ-Fe <sub>5</sub> C <sub>2</sub> (I)   | 0.17                 | 0.07         | 183          | 31.2                         |
|                          | χ-Fe <sub>5</sub> C <sub>2</sub> (II)  | 0.27                 | 0.05         | 220          | 32.8                         |
|                          | χ-Fe <sub>5</sub> C <sub>2</sub> (III) | 0.21                 | 0.16         | 108          | 22.9                         |

## Supplementary References

1. Berry, F. J., Skinner, S. & Thomas, M. F. Mössbauer spectroscopic examination of a single crystal of Fe<sub>3</sub>O<sub>4</sub>. *J. Phys.: Condens. Matter* **10**, 215-220 (1998).
2. Raupp, G. B. & Delgass, W. N. Mössbauer investigation of supported Fe and FeNi catalysts: II. Carbides formed Fischer-Tropsch synthesis. *J. Catal.* **58**, 348-360 (1979).
3. Tan, Y., Fujiwara, M., Ando, H., Xu, Q. & Souma, Y. Syntheses of isobutane and branched higher hydrocarbons from carbon dioxide and hydrogen over composite catalysts. *Ind. Eng. Chem. Res.* **38**, 3225-3229 (1999).
4. Wang, X. *et al.* Synthesis of isoalkanes over core (Fe-Zn-Zr)-shell (zeolite) catalyst from CO<sub>2</sub> hydrogenation. *Chem. Commun.* **52**, 7352-7355 (2016).
5. Nam, S.-S., Kishan, G., Lee, M.-W., Choi, M.-J. & Lee, K.-W. Selective synthesis of C<sub>2</sub>-C<sub>4</sub> olefins and C<sub>5+</sub> hydrocarbons over unpromoted and cerium-promoted iron catalysts supported on ion exchanged (H, K) zeolite-Y. *J. Chem. Res.(S)*, 344-345 (1999).
6. Nam, S.-S., Kim, H., Kishan, G., Choi, M.-J. & Lee, K.-W. Catalytic conversion of carbon dioxide into hydrocarbons over iron supported on alkali ion-exchanged Y-zeolite catalysts. *Appl. Catal. A: Gen* **179**, 155-163 (1999).
7. Xu, Q. *et al.* Hydrogenation of carbon dioxide over Fe-Cu-Na/zeolite composite catalysts: Na migration via solid-solid reaction and its effects on the catalytic activity. *J. Mol. Catal. A: Chem.* **136**, 161-168 (1998).
8. Choi, Y. H. *et al.* Carbon dioxide Fischer-Tropsch synthesis: a new path to

- carbon-neutral fuels. *Appl. Catal. B: Environ* **202**, 605-610 (2017).
9. Fujiwara, M., Satake, T., Shiokawa, K. & Sakurai, H. CO<sub>2</sub> hydrogenation for C<sub>2+</sub> hydrocarbon synthesis over composite catalyst using surface modified HB zeolite. *Appl. Catal. B: Environ* **179**, 37-43 (2015).
  10. Bai, R., Tan, Y. & Han, Y. Study on the carbon dioxide hydrogenation to iso-alkanes over Fe–Zn–M/zeolite composite catalysts. *Fuel Process. Technol.* **86**, 293-301 (2004).
  11. Li, C., Yuan, X. & Fujimoto, K. Direct synthesis of LPG from carbon dioxide over hybrid catalysts comprising modified methanol synthesis catalyst and  $\beta$ -type zeolite. *Appl. Catal. A: Gen* **475**, 155-160 (2014).
